# Supplementary material
Source: PubMed Central journal article supplement (PMC4169969)
Supplement: pnas.201405253SI.pdf [file pnas.201405253SI.pdf]

# Supporting Information

Moore et al. 10.1073/pnas.1405253111

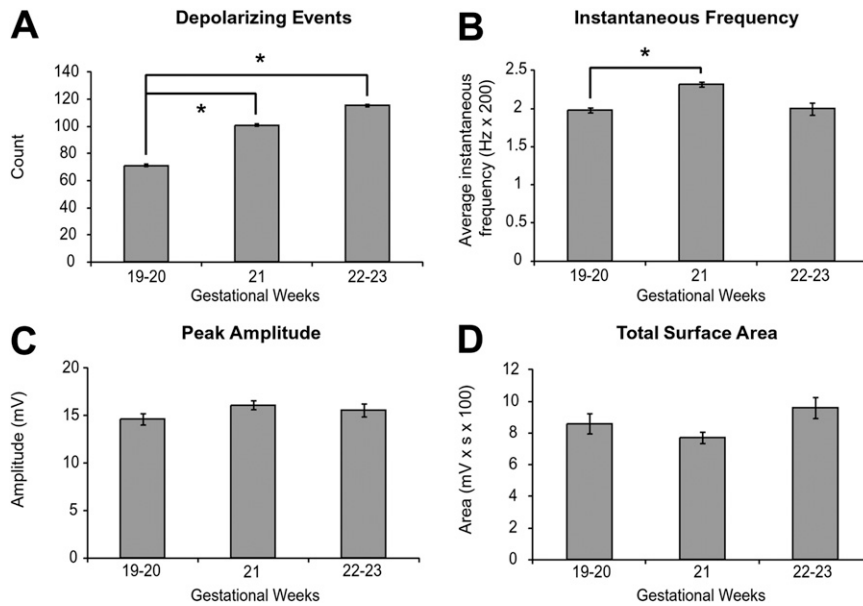

**Fig. S1.** Spontaneous electrical activity across three gestational ages. (A) The number of depolarizing events (threshold set at 5 mV; see *Methods*) detected during a 5-min recording session. (B) Average instantaneous frequency of depolarizing events during the 5-min recording session. (C) Average peak amplitude of all depolarizing events, including action potentials. (D) Sum of the measured surface area of the data trace. \* $P < 0.05$ . The number of subplate (SP) neurons included in age groups 19–20, 21, and 22–23 gestational weeks (gw) was  $n = 44, 45,$  and  $29,$  respectively.

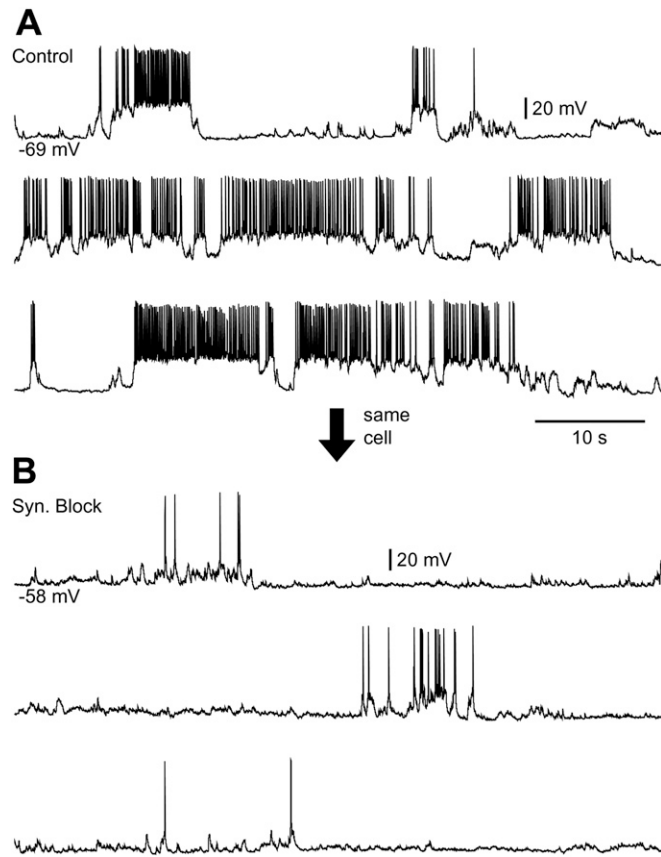

**Fig. S2.** Synaptic blockers reduced but did not eliminate spontaneous electrical activity. (A) Spontaneous activity in human SP neuron at 21 gw. (B) Same cell as in A is bath perfused with a mixture of synaptic blockers including 6,7-dinitroquinoxaline-2,3(1H,4H)-dione (DNQX; 20  $\mu$ M), DL-2-amino-5-phosphonovaleric acid (APV; 20  $\mu$ M), bicuculline (20  $\mu$ M), and strychnine (20  $\mu$ M).

A

| Experiment 1     |                     |                   |                   |                           |                     |                             |
|------------------|---------------------|-------------------|-------------------|---------------------------|---------------------|-----------------------------|
| Sample:          | Ganglionic Eminence | Cortical Mantle 1 | Cortical Mantle 2 | Subventricular zone (SVZ) | Cortical Plate (CP) | Human Adult Brain Total RNA |
| Age:             | 17 gw               | 17 gw             | 17 gw             | 19 gw                     | 19 gw               | commercial sample           |
| Cxn26            | negative            | positive          | positive          | positive                  | positive            | positive                    |
| Cxn32 (Var1)     | negative            | negative          | negative          | negative                  | negative            | negative                    |
| Cxn32 (Var2)     | negative            | negative          | negative          | negative                  | negative            | positive                    |
| Cxn36            | negative            | negative          | negative          | positive                  | positive            | negative                    |
| Cxn43 (Primer 1) | positive            | negative          | negative          | negative                  | negative            | negative                    |
| Cxn45            | positive            | positive          | positive          | positive                  | positive            | negative                    |
| Pxn1 (Primer 1)  | positive            | negative          | negative          | negative                  | negative            | negative                    |
| Beta Actin       | positive            | positive          | positive          | positive                  | positive            | positive                    |

B

| Experiment 2     |                  |                  |                 |                 |                |                             |
|------------------|------------------|------------------|-----------------|-----------------|----------------|-----------------------------|
| Sample:          | Cortical Plate 1 | Cortical Plate 2 | Cortical Mantle | Cortical Mantle | Isolated Cells | Human Fetal Brain Total RNA |
| Age:             | 17 gw            | 17 gw            | 18 gw           | 20 gw           | 22 gw          | commercial sample           |
| Cxn26 (Primer 1) | negative         | positive         | negative        |                 |                | positive                    |
| Cxn26 (Primer 2) | negative         | negative         | negative        |                 |                | negative                    |
| Cxn32 (Var1)     | negative         | negative         | negative        | negative        | negative       | negative                    |
| Cxn32 (Var2)     | negative         | negative         | negative        | negative        | negative       | negative                    |
| Cxn36 (Primer 1) | negative         | negative         | negative        | negative        | negative       | negative                    |
| Cxn36 (Primer 2) | positive         | positive         | negative        |                 |                | positive                    |
| Cxn43 (Primer 1) | negative         | negative         | negative        |                 |                | negative                    |
| Cxn43 (Primer 2) | positive         | positive         | negative        |                 |                | negative                    |
| Cxn45            | negative         | negative         | negative        |                 |                | negative                    |
| Cxn47            | negative         | negative         | negative        |                 |                | negative                    |
| Pxn1 (Primer 1)  | positive         | positive         | positive        | negative        | negative       | positive                    |
| Pxn1 (Primer 2)  | negative         | negative         | negative        | negative        | negative       | negative                    |
| Beta Actin       | positive         | positive         | positive        | positive        | positive       | positive                    |

**Fig. S3.** Gene expression analysis in human fetal cortex during the second trimester of gestation. (A) This table corresponds with the PCR data shown in Fig. 5A. Green boxes indicate that the expression of a gene was positively detected (positive). White boxes signify that tissue was tested but the expression of that gene was not detected (negative). (B) A second experiment was performed by using: (i) new tissue samples; (ii) the same primers as used in experiment 1 (primer 1); as well as (iii) newly designed primers (primer 2). Black boxes mean that the PCR was not attempted due to a low RNA yield in these two samples. Because of limited availability, we had to prioritize the genes that were screened. As a consequence, only five genes in two human samples, 22 gw and Isolated cells, were tested. Isolated cells means that human fetal brain tissue was dissociated, and the resulting cells were cultured. We used isolated cells because we could not obtain fresh tissue samples at older age (22 gw) suitable for PCR analysis. Cortical plate marks human fetal brain slices in which the subventricular zone (SVZ) was removed. "Cortical Mantle" marks human fetal brain slices encompassing the entire cortical wall, including the ventricular zone and SVZ. The following primers were used to perform RT-PCR:

ACTB: F 5'-CCTCGCCTTGGCCGATCC, R 5'-GATGCCGTGCTCGATGGGGT;  
Cx 26: F 5'-TCCCGACGCAGAGC AAAC, R 5'-AGGGTGTTCAGACAAAGTC;  
Cx 30: F 5'-CTTCACCCGAAACCCGACG, R 5'-CCACTGGAGTGCCTAGA AGC;  
Cx31.1: F 5'-TTCCCCGCTTCTGGATATGAAA, R 5'-GGCGAGTATTGCAATCGAAG;  
Cx32: F 5'-GACATGAGAC CATAGGGGAC, R 5'-GTGTCCTGAGATGTGGACC;  
Cx36: F 5'-ACTCCAATATGATCGGAAGGATCC, R 5'-CTGCAGG GTGTTGCACAC;  
Cx43: F 5'-TGAGTGCCTGAACCTGCCTT, R 5'-TGACACCATCAGTTTGGGCA;  
Panx1: F 5'-ATTCA TATTGCTGGGCGGCT, R 5'-GCAGCCTAATTGCACGGTT.
